# Supplementary material for: Phytochemical Composition and Bioactivities of Aqueous Extract of Rambutan (Nephelium lappaceum L. cv. Rong Rian) Peel
Source: MDPI journal article supplement (doi:10.3390/antiox11050956), 2022-05-12
Supplement: s1 [file s1]

**Table S1.** Summary of phytochemical compounds in rambutan peel extract (RPE) by GC-MS.

| RT      | Compound name                                                               | CAS#         | Formula                                        | Component area | Match factor | % of Total |
|---------|-----------------------------------------------------------------------------|--------------|------------------------------------------------|----------------|--------------|------------|
| 10.1546 | 2-(2-Methylphenyl)ethanol                                                   | 19819-98-8   | C <sub>9</sub> H <sub>12</sub> O               | 40407          | 82.9         | 0.87       |
| 10.5000 | 1-Hexen-1-one                                                               | 89723-54-6   | C <sub>6</sub> H <sub>10</sub> O               | 11376.5        | 90.1         | 0.22       |
| 15.5889 | Acetic acid                                                                 | 64-19-7      | C <sub>2</sub> H <sub>4</sub> O <sub>2</sub>   | 210822.5       | 99           | 2.75       |
| 15.7927 | 2-Furan-carboxaldehyde                                                      | 98-01-1      | C <sub>5</sub> H <sub>4</sub> O <sub>2</sub>   | 87888.4        | 96.1         | 1.98       |
| 17.9283 | Butanoic acid, 2-hydroxy-, methyl ester                                     | 29674-47-3   | C <sub>5</sub> H <sub>10</sub> O <sub>3</sub>  | 11178.7        | 86.6         | 0.28       |
| 19.0076 | 5-Methylfuran-2-carbaldehyde                                                | 620-02-0     | C <sub>6</sub> H <sub>6</sub> O <sub>2</sub>   | 20363.8        | 86.9         | 0.24       |
| 19.1055 | 2-Butanol, 3-methyl-, (S)-                                                  | 1517-66-4    | C <sub>5</sub> H <sub>12</sub> O               | 14680.6        | 82.9         | 0.02       |
| 20.9707 | 2-Pentenal, (E)-                                                            | 1576-87-0    | C <sub>5</sub> H <sub>8</sub> O                | 249447         | 87.4         | 3.89       |
| 21.5688 | 3-Furanmethanol                                                             | 4412-91-3    | C <sub>5</sub> H <sub>6</sub> O <sub>2</sub>   | 23184.6        | 89.9         | 0.51       |
| 21.7451 | Myrcene                                                                     | 123-35-3     | C <sub>10</sub> H <sub>16</sub>                | 10805.9        | 88.9         | 0.38       |
| 24.5133 | 2-Cyclopenten-1-one, 2-hydroxy-                                             | 10493-98-8   | C <sub>5</sub> H <sub>6</sub> O <sub>2</sub>   | 113223.4       | 96           | 1.96       |
| 27.1529 | Cellulose pyrolysis product                                                 | 2000020-96-8 | C <sub>5</sub> H <sub>6</sub> O <sub>3</sub>   | 17479.1        | 85.8         | 0.36       |
| 28.9044 | 2-Propenamide                                                               | 79-06-1      | C <sub>3</sub> H <sub>5</sub> NO               | 21029.7        | 88           | 0.42       |
| 30.0091 | Levogluconone                                                               | 37112-31-5   | C <sub>6</sub> H <sub>6</sub> O <sub>3</sub>   | 48424.4        | 83.5         | 0.86       |
| 30.3314 | " 5,6 - dihydro - pyran - 2,5 - di - one " (so Pastorova) questionable name | 5926-95-4    | C <sub>5</sub> H <sub>4</sub> O <sub>3</sub>   | 51795.3        | 97.1         | 0.95       |
| 30.6622 | Phenol (hydroxybenzene)                                                     | 108-95-2     | C <sub>6</sub> H <sub>6</sub> O                | 102451.9       | 95.2         | 1.79       |
| 31.7726 | 2H-Pyran-2-one, 4-hydroxy-6-methyl-                                         | 675-10-5     | C <sub>6</sub> H <sub>6</sub> O <sub>3</sub>   | 11691          | 80.8         | 0.50       |
| 32.4191 | Dihydroxyacetone                                                            | 96-26-4      | C <sub>3</sub> H <sub>6</sub> O <sub>3</sub>   | 124683.2       | 90.2         | 1.76       |
| 33.2447 | 2,5 and 2,6-dimethyl dioxene                                                | 2000021-48-0 | C <sub>6</sub> H <sub>10</sub> O <sub>2</sub>  | 38421.6        | 85           | 0.71       |
| 34.4638 | 3-Furanol, tetrahydro-                                                      | 453-20-3     | C <sub>4</sub> H <sub>8</sub> O <sub>2</sub>   | 13540.2        | 80.5         | 0.45       |
| 36.6134 | 2,3-Dihydro-3,5-dihydroxy-6-methyl-4H-pyran-4-one                           | 28564-83-2   | C <sub>6</sub> H <sub>8</sub> O <sub>4</sub>   | 94024.3        | 95.4         | 1.64       |
| 37.5876 | 1,2,3-Propanetriol (glycerol)                                               | 56-81-5      | C <sub>3</sub> H <sub>8</sub> O <sub>3</sub>   | 237905.7       | 96.2         | 2.74       |
| 40.294  | 1,2-Diphenylethan-1-ol                                                      | 2000196-91-3 | C <sub>14</sub> H <sub>14</sub> O              | 128537         | 97.2         | 1.96       |
| 41.3781 | Decanoic acid, ethyl ester                                                  | 110-38-3     | C <sub>12</sub> H <sub>24</sub> O <sub>2</sub> | 16216.6        | 89.1         | 0.58       |
| 41.5651 | 5-Hydroxymethylfurfural                                                     | 67-47-0      | C <sub>6</sub> H <sub>6</sub> O <sub>3</sub>   | 278644.4       | 94.9         | 4.24       |
| 45.6479 | Catechol (1,2-benzenediol)                                                  | 120-80-9     | C <sub>6</sub> H <sub>6</sub> O <sub>2</sub>   | 1316339.3      | 96.1         | 21.90      |
| 48.8704 | Propane, 2-methoxy-2-methyl-                                                | 1634-04-4    | C <sub>5</sub> H <sub>12</sub> O               | 42148.8        | 82.2         | 0.85       |
| 56.7432 | Mome inositol                                                               | 0-00-0       | C <sub>7</sub> H <sub>14</sub> O <sub>6</sub>  | 3878135.5      | 87.8         | 26.84      |
